# Supplementary material for: Wild carrot pentane-based fractions suppress proliferation of human HaCaT keratinocytes and protect against chemically-induced skin cancer
Source: BMC Complement Altern Med. 2017 Jan 10;17:36. doi: 10.1186/s12906-016-1531-0 (PMC5223476; doi:10.1186/s12906-016-1531-0)
Supplement: Additional file 1: — Shebaby et al. Raw Data R4. (XLSX 56 kb) [file 12906_2016_1531_MOESM1_ESM.xlsx]

## Sheet: Number of papilloma per mouse
Number of papilloma per mouse
	nb of papi/mouse		DMSO	10mg	50mg	200mg			nb of papi/mouse		DMSO	10mg	50mg	200mg			nb of papi/mouse		DMSO	10mg	50mg	200mg
			week 15	week 15	week 15	week 15					week 18	week 18	week 18	week 18					week 21	week 21	week 21	week 21
			14	12	10	9					14	11	11	10					14	12	8	6
			17	14	13	7					13	12	12	7					13	13	11	0
			16	13	12	9					15	13	10	9					12	11	9	11
			13	13	13	8					13	13	10	10					13	10	10	0
			11	12	12	9					13	12	12	8					13	11	0	0
			16	12	13	11					14	11	10	9					14	10	0	8
			14	14	13	11					14	12	0	0					15	8	9	0
			15	12	12	9					13	11	0	0					13	12	11	8
			15	11	0	0					12	0	0	0					12	0	0	0
			16	0	0	0					15	0	0	0					14	0	0	5

## Sheet: Papilloma volume
Papilloma Volume
	W 15	DMSO	10mg	50mg	200mg		W18	DMSO	10mg	50mg	200mg		W21	DMSO	10mg	50mg	200mg
		118	59	63	45			136	80	66	45			173	124	91	67
		88	58	43	22			106	69	60	0			136	108	82	0
		96	60	45	40			115	72	57	40			131	103	79	61
		71	22	37	20			98	0	54	0			119	0	76	0
		86	53	34	55			101	87	0	50			125	116	0	69
		56	77	26	29			82	103	0	38			108	134	0	56
		67	66	75	34			90	79	72	33			118	107	97	0
		62	0	36	30			96	0	55	34			117	0	72.5	53
		93	74	0	0			106	106	0	0			139	122	0	0
		98	68	0	0			123	88	0	0			167	114	0	0

## Sheet:  cell cycle results-Hacat A5
		Cell cycle analysis
Hacat-A5
	Exp-1		control	DMSO	F2-25	F2-50
		Sub-G1	0.0172	0.0179	0.365	1
		G1	0.4325	0.4355	0.3455	0
		S	0.2168	0.1694	0.1071	0
		G2/M	0.263	0.2975	0.1557	0
	Exp-2		control	DMSO	F2-25	F2-50
		Sub-G1	0.0483	0.0322	0.5556	0.9643
		G1	0.4409	0.5107	0.3241	0.0238
		S	0.2579	0.2425	0.0741	0.0007
		G2/M	0.2198	0.1931	0.037	0.0009
	Exp-3		control	DMSO	F2-25	F2-50
		Sub-G1	0.0302	0.023	0.4306	0.976
		G1	0.4057	0.5097	0.3563	0.024
		S	0.1564	0.1549	0.0865	0
		G2/M	0.202	0.2133	0.1265	0

## Sheet: cell cycle results-II4
			Cell cycle analysis
Hacat-II-4
	Exp-1		control	DMSO	F2-25	F2-50
		Sub-G1	0.0235	0.0193	0.2255	0.9795
		G1	0.4272	0.4152	0.5447	0.0205
		S	0.2103	0.1936	0.0864	0
		G2/M	0.2282	0.2447	0.0871	0
	Exp-2		control	DMSO	F2-25	F2-50
		Sub-G1	0.0158	0.0104	0.1109	0.9877
		G1	0.3617	0.4147	0.5211	0.0123
		S	0.2744	0.2337	0.1349	0.0004
		G2/M	0.2429	0.2149	0.1451	0.0009
	Exp-3		control	DMSO	F2-25	F2-50
		Sub-G1	0.0288	0.0374	0.1592	0.9627
		G1	0.4017	0.4347	0.5101	0.0293
		S	0.2514	0.2137	0.1009	0
		G2/M	0.2599	0.2149	0.1186	0

## Sheet: Body weight
Body Weight
	W 0	DMSO	10mg	50mg	200mg		W 5	DMSO	10mg	50mg	200mg		W13	DMSO	10mg	50mg	200mg		W21	DMSO	10mg	50mg	200mg
		19.5	20.1	20.8	22.5			24.6	30.3	32.1	31.5			25	31.5	34.1	32.9			25.8	30.8	33.4	32.1
		20.1	20.7	19.8	21.8			29.6	30.6	28.4	30.5			31.6	31.2	27.5	32.2			33.1	32.8	26.7	31.9
		18.8	19.2	19.5	18.6			24.6	26.9	26.4	24.2			24.9	25	24.8	24.1			25.4	25.4	25.3	23.8
		19.4	19.1	21.1	21.9			24.2	26.1	31.8	29.8			24.5	26	34.2	30.2			25.5	25.5	33.5	29.1
		21.2	20.4	20.1	18.5			30.1	30.4	27.9	24.5			31.5	31.9	26.1	25.3			33.8	30.5	26.5	24.1
		19.8	18.1	21.4	20.7			24.1	24.7	32.7	29.5			24.1	24.1	32.4	30.6			25.1	23.3	32.1	29.2
		20.9	18.9	18.5	18.2			28	24.1	23.5	24.5			29.2	24.7	22.1	24.1			34.1	23.4	22.9	23.5
		21.2	19.5	20.9	19.2			29.5	27.3	28.6	26.5			31.3	28	26.8	27.1			33.3	27.1	26.4	26.5
		21.1	20.4	19.6	19.9			29.2	31.3	25.6	28.9			32.1	31.5	22.9	30.1			33.9	31.1	23.2	29.1
		20.4	19.2	20.3	22.2			29.9	26.5	32.6	31.5			31.5	26.5	33.8	31.7			32.7	25.5	32.9	30.5

## Sheet: Densitometer-intensity data 
Exp1	p-AKT/AKT											Exp1	Bax/Actin										Exp1	Bax/Bcl2										Exp1	Bcl2/Actin											Exp1	Caspase-3/Actin
	Channel	Band No.	Volume (Int)	Band %		Norm. Factor	Norm. Vol. (Int)	densitometric value		Final.R			Channel	Band No.	Volume (Int)	Band %		Norm. Factor	Norm. Vol. (Int)	densitometric value	Final.R			Channel	Band No.	Volume (Int)	Band %		Norm. Factor	Norm. Vol. (Int)	densitometric value	Final.R			Channel	Band No.	Volume (Int)	Band %		Norm. Factor	Norm. Vol. (Int)	densitometric value		Final.R			Channel	Band No.	Volume (Int)
Ctrl	Chemi Hi Sensitivity	1	1890950	100		1	1890950	0.733315		0.797082		Ctrl	Chemi Hi Sensitivity	1	3148257	100		1	3298257	0.128473	0.103608		Ctrl	Chemi Hi Sensitivity	1	2625714	100		1	2625714	0.0737696	0.00981738		Ctrl	Chemi Hi Sensitivity	1	3298808	100		1	3298808	0.788203		0.916515		Ctrl	Chemi Hi Sensitivity	1	2111569
	Chemi Hi Sensitivity	1	2578632	100		1	2578632						Chemi Hi Sensitivity	1	423738	100		1	423738					Chemi Hi Sensitivity	1	193698	100		1	193698					Chemi Hi Sensitivity	1	2600130	100		1	2600130						Chemi	1	2105426
DMSO	Chemi Hi Sensitivity	1	2024875	100		1.00388	2032720	0.922893		1.00314		DMSO	Chemi Hi Sensitivity	1	2300328	100		1.18661	2729592	0.30901	0.249202		DMSO	Chemi Hi Sensitivity	1	2051504	100		1.2799	2625714	0.404677	0.053855		DMSO	Chemi Hi Sensitivity	1	2399752	100		1.18711	2730048	0.862215		1.00258		DMSO	Chemi Hi Sensitivity	1	1460871
	Chemi Hi Sensitivity	1	2194052	100		1.00388	2202552						Chemi Hi Sensitivity	1	710825	100		1.18661	843471					Chemi Hi Sensitivity	1	830196	100		1.2799	1062565					Chemi Hi Sensitivity	1	1982880	100		1.18711	2353887						Chemi	1	1592358
F2-25	Chemi Hi Sensitivity	1	877200	100		1.56539	1373162	0.445597		0.484344		F2-25	Chemi Hi Sensitivity	1	2187888	100		1.24759	2729592	0.862234	0.69535		F2-25	Chemi Hi Sensitivity	1	1015950	100		2.58449	2625714	2.03966	0.271442		F2-25	Chemi Hi Sensitivity	1	2205840	100		1.23765	2730048	0.468025		0.544216		F2-25	Chemi Hi Sensitivity	1	2707363
	Chemi Hi Sensitivity	1	1968596	100		1.56539	3081626						Chemi Hi Sensitivity	1	1886472	100		1.24759	2353547					Chemi Hi Sensitivity	1	2072196	100		2.58449	5355572					Chemi Hi Sensitivity	1	1032390	100		1.23765	1277732						Chemi	1	1219091
F2-50	Chemi Hi Sensitivity	1	150150	100		1.80492	271009	0.133641		0.145262		F2-50	Chemi Hi Sensitivity	1	1175928	100		2.32122	2729592	1.24257	1.00207		F2-50	Chemi Hi Sensitivity	1	243152	100		10.7987	2625714	7.51419	1		F2-50	Chemi Hi Sensitivity	1	1215419	100		2.32845	2830048	0.0255109		0.0296638		F2-50	Chemi Hi Sensitivity	1	1518112
	Chemi Hi Sensitivity	1	1123528	100		1.80492	2027883						Chemi Hi Sensitivity	1	1461174	100		2.32122	3391711					Chemi Hi Sensitivity	1	1827090	100		10.7987	19730110						1	31006	100		2.32845	72197						Chemi	1	483091
																							Exp2	Bax/Bcl2										Exp2	Bcl2/Actin											Exp2	Caspase-3/Actin
																								Channel	Band No.	Volume (Int)	Band %		Norm. Factor	Norm. Vol. (Int)	densitometric value	Final.R			Channel	Band No.	Volume (Int)	Band %		Norm. Factor	Norm. Vol. (Int)	densitometric value		Final.R			Channel	Band No.	Volume (Int)
																							Ctrl	Chemi Hi Sensitivity	1	1045894	100		1	1045894	0.238619	0.0316891		Ctrl	Chemi Hi Sensitivity	1	2623790	100		1	2623790	0.863122		1.00363		Ctrl	Chemi Hi Sensitivity	1	1437554
																								Chemi Hi Sensitivity	1	249570	100		1	249570					Chemi Hi Sensitivity	1	2264652	100		1	2264652						Chemi	1	1225876
												Exp2	Bax/Actin										DMSO	Chemi Hi Sensitivity	1	2114672	100		1.36564	2.88788e+06	0.14832	0.0196973		DMSO	Chemi Hi Sensitivity	1	2859755	100		1.08472	3.10204e+06	0.774763		0.900887		DMSO	Chemi Hi Sensitivity	1	1974377
													Channel	Band No.	Volume (Int)	Band %		Norm. Factor	Norm. Vol. (Int)	densitometric value	Final.R			Chemi Hi Sensitivity	1	313649	100		1.36564	428331					Chemi Hi Sensitivity	1	2215632	100		1.08472	2.40334e+06						Chemi	1	1785432
Exp2	p-AKT/AKT											Ctrl	Chemi Hi Sensitivity	1	1579296	100		1	1579296	0.290928	0.199266		F2-25	Chemi Hi Sensitivity	1	1199597	100		2.87476	3.44855e+06	2.32457	0.308708		F2-25	Chemi Hi Sensitivity	1	2309874	100		1.64975	3.81072e+06	0.393906		0.458031		F2-25	Chemi Hi Sensitivity	1	2412899
	Channel	Band No.	Volume (Int)	Band %		Norm. Factor	Norm. Vol. (Int)	densitometric value		Final.R			Chemi Hi Sensitivity	1	459462	100		1	459462					Chemi Hi Sensitivity	1	2788549	100		2.87476	8.01641e+06					Chemi Hi Sensitivity	1	909874	100		1.64975	1.50107e+06						Chemi	1	977654
Ctrl	Chemi Hi Sensitivity	1	2368532	100		1	2368532	0.904491		0.952096		DMSO	Chemi Hi Sensitivity	1	1650328	100		1.05097	1.73445e+06	0.417269	0.285801		F2-50	Chemi Hi Sensitivity	1	270963	100		9.10386	2.46681e+06	7.5275	0.999668		F2-50	Chemi Hi Sensitivity	1	2535432	100		2.82464	7.16168e+06	0.0545982		0.0634863		F2-50	Chemi Hi Sensitivity	1	1678553
	Chemi Hi Sensitivity	1	2618635	100		1	2618635						Chemi Hi Sensitivity	1	688631	100		1.05097	723731					Chemi Hi Sensitivity	1	2039675	100		9.10386	1.85689e+07						1	138430	100		2.82464	391015						Chemi	1	525467
DMSO	Chemi Hi Sensitivity	1	1974394	100		1.10348	2.17871e+06	0.947419		0.997283		F2-25	Chemi Hi Sensitivity	1	1976487	100		1.31509	2.59926e+06	0.804874	0.551284
	Chemi Hi Sensitivity	1	2083972	100		1.10348	2.29962e+06						Chemi Hi Sensitivity	1	1590823	100		1.31509	2.09208e+06															Exp3	Bcl2/Actin											Exp3	Caspase-3/Actin
F2-25	Chemi Hi Sensitivity	1	710134	100		1.51287	1.07434e+06	0.305436		0.321512		F2-50	Chemi Hi Sensitivity	1	1093290	100		1.98476	2.16992e+06	1.46121	1.00083		Exp3	Bax/Bcl2											Channel	Band No.	Volume (Int)	Band %		Norm. Factor	Norm. Vol. (Int)	densitometric value		Final.R			Channel	Band No.	Volume (Int)
	Chemi Hi Sensitivity	1	2324985	100		1.51287	3.51741e+06						Chemi Hi Sensitivity	1	1597529	100		1.98476	3.17071e+06					Channel	Band No.	Volume (Int)	Band %		Norm. Factor	Norm. Vol. (Int)	densitometric value	Final.R		Ctrl	Chemi Hi Sensitivity	1	3048503	100		1	3048503	0.780368		0.951668		Ctrl	Chemi Hi Sensitivity	1	1198765
F2-50	Chemi Hi Sensitivity	1	147658	100		1.98847	293614	0.163564		0.172172													Ctrl	Chemi Hi Sensitivity	1	12036421	100		1	12036421	0.522961	0.0706705			Chemi Hi Sensitivity	1	2378954	100		1	2378954						Chemi	1	1468675
	Chemi Hi Sensitivity	1	902756	100		1.98847	1.79511e+06					Exp3	Bax/Actin											Chemi Hi Sensitivity	1	6294584	100		1	6294584				DMSO	Chemi Hi Sensitivity	1	2304758	100		1.13956	2.62642e+06	0.820231		1.00028		DMSO	Chemi Hi Sensitivity	1	1685443
													Channel	Band No.	Volume (Int)	Band %		Norm. Factor	Norm. Vol. (Int)	densitometric value	Final.R		DMSO	Chemi Hi Sensitivity	1	1394563	100		1.1969	1.66915e+06	0.640281	0.0865244			Chemi Hi Sensitivity	1	1890433	100		1.13956	2.15427e+06						Chemi	1	1957234
Exp3	p-AKT/AKT											Ctrl	Chemi Hi Sensitivity	1	2689730	100		1	2689730	0.195778	0.154156			Chemi Hi Sensitivity	1	892912	100		1.1969	1.06873e+06				F2-25	Chemi Hi Sensitivity	1	1988964	100		1.48699	2.95756e+06	0.476457		0.581045		F2-25	Chemi Hi Sensitivity	1	1857363
	Channel	Band No.	Volume (Int)	Band %		Norm. Factor	Norm. Vol. (Int)	densitometric value		Final.R			Chemi Hi Sensitivity	1	526590	100		1	526590				F2-25	Chemi Hi Sensitivity	1	4080210	100		3.24529	1.32415e+07	2.0431	0.276095			Chemi Hi Sensitivity	1	947655	100		1.48699	1.40915e+06						Chemi	1	802554
Ctrl	Chemi Hi Sensitivity	1	1928540	100		1	1928540	0.861124		0.956805		DMSO	Chemi Hi Sensitivity	1	2137597	100		1.02384	2.18856e+06	0.271688	0.213928			Chemi Hi Sensitivity	1	8336291	100		3.24529	2.70537e+07				F2-50	Chemi Hi Sensitivity	1	2496790	100		3.14634	7.85576e+06	0.00818251		0.00997867		F2-50	Chemi Hi Sensitivity	1	1696580
	Chemi Hi Sensitivity	1	2239561	100		1	2239561						Chemi Hi Sensitivity	1	580760	100		1.02384	594605				F2-50	Chemi Hi Sensitivity	1	305901	100		8.55793	2.61788e+06	7.3985	0.999797				1	20430	100		3.14634	64279.8						Chemi	1	518201
DMSO	Chemi Hi Sensitivity	1	2039881	100		1.15396	2.35393e+06	0.899838		0.99982		F2-25	Chemi Hi Sensitivity	1	2212358	100		1.1841	2.61964e+06	0.767928	0.604668			Chemi Hi Sensitivity	1	2263208	100		8.55793	1.93684e+07
	Chemi Hi Sensitivity	1	2266943	100		1.15396	2.61595e+06						Chemi Hi Sensitivity	1	1698932	100		1.1841	2.0117e+06
F2-25	Chemi Hi Sensitivity	1	939382	100		1.3933	1.30884e+06	0.373697		0.415219		F2-50	Chemi Hi Sensitivity	1	1075928	100		2.12759	2.28914e+06	1.26761	0.99812
	Chemi Hi Sensitivity	1	2513750	100		1.3933	3.5024e+06						Chemi Hi Sensitivity	1	1363860	100		2.12759	2.90174e+06
F2-50	Chemi Hi Sensitivity	1	140658	100		1.7931	252214	0.102704		0.114115
	Chemi Hi Sensitivity	1	1369549	100		1.7931	2.45574e+06
[truncated: 32 more columns]

## Sheet: WST results
	WST results for all HaCat cell lines
		Exp1	Hacat-II4	Concentration in µg/ml											Exp1	HaCat-A5	Concentration in µg/ml											Exp1	Hacat-N	Concentration in µg/ml
			Fractions	100	100	50	50	25	25	10	10	Control	DMSO			Fractions	100	100	50	50	25	25	10	10	C	DMSO			Fractions	100	100	50	50	25	25	10	10	C	DMSO
		Absorbance	F1	0.384	0.31	0.367	0.5	0.368	0.583	1.196	0.863	2.018	1.891		Absorbance	F1	0.33	0.338	0.324	0.309	0.487	0.441	1.403	1.61	2.531	2.511		Absorbance	F1	0.456	0.591	0.849	0.881	1.261	1.167	2.436	1.654	2.168	2.4
			F2	0.31	0.35	0.376	0.357	0.768	0.566	0.886	0.975	2.288	1.942			F2	0.326	0.358	0.324	0.324	0.71	0.753	1.821	1.729	2.458	2.442			F2	0.455	0.419	0.413	0.516	1.148	1.261	2.095	2.344	2.216	2.254
			F3	0.36	0.347	0.359	0.348	0.743	0.621	1.447	1.673					F3	0.323	0.329	0.435	0.344	1.055	0.93	1.772	1.982					F3	0.713	0.471	0.978	1.229	1.868	1.56	1.96	2.119
			F4	0.335	0.36	0.354	0.425	0.763	0.857	1.628	1.485					F4	0.389	0.379	0.732	0.692	1.121	1.213	1.475	2.152					F4	0.506	0.479	0.843	1.3	1.57	1.882	1.801	1.848
			Media	0.29	0.29	0.29	0.29	0.29	0.29	0.29	0.29	0.29	0.29			Media	0.26	0.26	0.26	0.26	0.26	0.26	0.26	0.26	0.26	0.26			Media	0.27	0.27	0.27	0.27	0.27	0.27	0.27	0.27	0.27	0.27
			F1-Media	0.094	0.02	0.077	0.21	0.078	0.293	0.906	0.573	1.728	1.601			F1-Media	0.07	0.078	0.064	0.049	0.227	0.181	1.143	1.35	2.271	2.251			F1-Media	0.186	0.321	0.579	0.611	0.991	0.897	2.166	1.384	1.898	2.13
			F2-Media	0.02	0.06	0.086	0.067	0.478	0.276	0.596	0.685	1.998	1.652			F2-Media	0.066	0.098	0.064	0.064	0.45	0.493	1.561	1.469	2.198	2.182			F2-Media	0.185	0.149	0.143	0.246	0.878	0.991	1.825	2.074	1.946	1.984
			F3-Media	0.07	0.057	0.069	0.058	0.453	0.331	1.157	1.383					F3-Media	0.063	0.069	0.175	0.084	0.795	0.67	1.512	1.722					F3-Media	0.443	0.201	0.708	0.959	1.598	1.29	1.69	1.849
			F4-media	0.045	0.07	0.064	0.135	0.473	0.567	1.338	1.195					F4-media	0.129	0.119	0.472	0.432	0.861	0.953	1.215	1.892					F4-media	0.236	0.209	0.573	1.03	1.3	1.612	1.531	1.578
		Exp2	Hacat-II4	Concentration in µg/ml
			Fractions	100	100	50	50	25	25	10	10	C	DMSO
		Absorbance	F1	0.39	0.44	0.366	0.405	0.368	0.417	2.1	1.052	2.894	2.7		Exp2	HaCat-A5	Concentration in µg/ml
			F2	0.383	0.373	0.358	0.368	0.5	0.924	1.395	2.037	2.565	2.338			Fractions	100	100	50	50	25	25	10	10	C	DMSO
			F3	0.362	0.364	0.395	0.366	1.262	1.216	2.311	2.512				Absorbance	F1	0.314	0.293	0.278	0.258	0.414	0.327	0.689	0.819	1.187	1.21		Exp2	HaCat-N	Concentration in µg/ml
			F4	0.331	0.294	0.308	0.286	0.709	0.712	1.379	1.692					F2	0.371	0.287	0.416	0.287	0.684	0.378	0.77	0.951	0.951	0.993			Fractions	100	100	50	50	25	25	10	10	C	DMSO
																F3	0.283	0.331	0.305	0.326	0.599	0.43	0.861	0.92				Absorbance	F1	0.39	0.4	0.642	0.722	0.869	0.947	0.966	1.159	1.4	1.21
			Media	0.28	0.28	0.28	0.28	0.28	0.28	0.28	0.28	0.28	0.28			F4	0.312	0.395	0.344	0.23	0.326	0.444	0.799	0.674					F2	0.368	0.366	0.529	0.455	0.951	1.212	0.762	0.757	1	1.186
			F1-Media	0.11	0.16	0.086	0.125	0.088	0.137	1.82	0.772	2.614	2.42																F3	0.349	0.389	0.867	0.673	0.875	0.911	1.13	0.947
			F2-Media	0.103	0.093	0.078	0.088	0.22	0.644	1.115	1.757	2.285	2.058			Media	0.264	0.264	0.264	0.264	0.264	0.264	0.264	0.264	0.264	0.264			F4	0.392	0.389	0.597	0.724	0.821	0.91	0.939	1.132
			F3-Media	0.082	0.084	0.115	0.086	0.982	0.936	2.031	2.232					F1-Media	0.05	0.029	0.014	-0.006	0.15	0.063	0.425	0.555	0.923	0.946
			F4-Media	0.051	0.014	0.028	0.006	0.429	0.432	1.099	1.412					F2-Media	0.107	0.023	0.152	0.023	0.42	0.114	0.506	0.687	0.687	0.729			Media	0.3	0.3	0.3	0.3	0.3	0.3	0.3	0.3	0.3	0.3
																F3-Media	0.019	0.067	0.041	0.062	0.335	0.166	0.597	0.656					F1-Media	0.09	0.1	0.342	0.422	0.569	0.647	0.666	0.859	1.1	0.91
		Exp3	Hacat-II4	Concentration in µg/ml												F4-media	0.048	0.131	0.08	-0.034	0.062	0.18	0.535	0.41					F2-Media	0.068	0.066	0.229	0.155	0.651	0.912	0.462	0.457	0.7	0.886
			Fractions	100	100	50	50	25	25	10	10	C	DMSO																F3-Media	0.049	0.089	0.567	0.373	0.575	0.611	0.83	0.647
		Absorbance	F1	0.268	0.367	0.493	0.527	0.513	0.43	1.202	0.98	1.679	1.927																F4-media	0.092	0.089	0.297	0.424	0.521	0.61	0.639	0.832
			F2	0.277	0.272	0.287	0.331	0.639	0.512	1.122	1.282	1.881	1.874
			F3	0.265	0.257	0.283	0.313	0.58	0.686	1.512	1.342	1.766	1.127
			F4	0.229	0.258	0.325	0.313	0.813	0.715	1.16	1.266				Exp3	Hacat-A5	Concentration in µg/ml
																Fractions	100	100	50	50	25	25	10	10	C	DMSO
			media	0.22	0.22	0.22	0.22	0.22	0.22	0.22	0.22	0.22	0.22		Absorbance	F1	0.11	0.096	0.094	0.122	0.225	0.19	0.51	0.421	1.345	0.987			Exp3	Hacat-N	Concentration in µg/ml
			F1-Media	0.048	0.147	0.273	0.307	0.293	0.21	0.982	0.76	1.459	1.707			F2	0.129	0.097	0.184	0.258	0.363	0.41	0.663	0.607	1.209	1.123				Fractions	100	100	50	50	25	25	10	10	C	DMSO
			F2-Media	0.057	0.052	0.067	0.111	0.419	0.292	0.902	1.062	1.661	1.654			F3	0.299	0.129	0.271	0.218	0.457	0.75	0.72	0.881					Absorbance	F1	0.374	0.323	0.642	0.695	1.083	0.989	1.684	1.766	2.2	1.972
			F3-Media	0.045	0.037	0.063	0.093	0.36	0.466	1.292	1.122	1.546	0.907			F4	0.19	0.309	0.344	0.334	0.574	0.567	0.614	0.761						F2	0.286	0.291	0.679	0.499	1.505	1.675	1.721	1.72	1.75	1.85
			F4-Media	0.009	0.038	0.105	0.093	0.593	0.495	0.94	1.046																			F3	0.295	0.291	1.292	1.304	1.756	1.531	2.283	1.986
																Media	0.1	0.1	0.1	0.1	0.1	0.1	0.1	0.1	0.1	0.1				F4	0.834	0.525	1.001	1.326	1.575	1.676	2.164	2.078
																F1-Media	0.01	-0.004	-0.006	0.022	0.125	0.09	0.41	0.321	1.245	0.887
																F2-Media	0.029	-0.003	0.084	0.158	0.263	0.31	0.563	0.507	1.109	1.023				Media	0.2	0.2	0.2	0.2	0.2	0.2	0.2	0.2	0.2	0.2
																F3-Media	0.199	0.029	0.171	0.118	0.357	0.65	0.62	0.781						F1-Media	0.174	0.123	0.442	0.495	0.883	0.789	1.484	1.566	2	1.772
																F4-media	0.09	0.209	0.244	0.234	0.474	0.467	0.514	0.661						F2-Media	0.086	0.091	0.479	0.299	1.305	1.475	1.521	1.52	1.55	1.65
																														F3-Media	0.095	0.091	1.092	1.104	1.556	1.331	2.083	1.786
																														F4-media	0.634	0.325	0.801	1.126	1.375	1.476	1.964	1.878
